# Supplementary material for: Subtyping analysis reveals new variants and accelerated evolution of Clostridioides difficile toxin B
Source: PubMed Central journal article supplement (PMC7335066; doi:10.1038/s42003-020-1078-y), 2020-07-03
Supplement: 42003_2020_1078_MOESM2_ESM.pdf [file 42003_2020_1078_MOESM2_ESM.pdf]

## Description of Additional Supplementary Files

**File Name:** Supplementary Data 1

**Description:** Source data underlying graphs and charts shown in figures and tables are provided in Supplementary Data 1.
